# Supplementary material
Source: PubMed Central journal article supplement (PMC1871862)

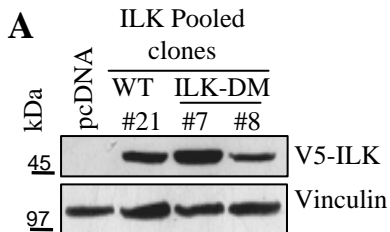

**B**

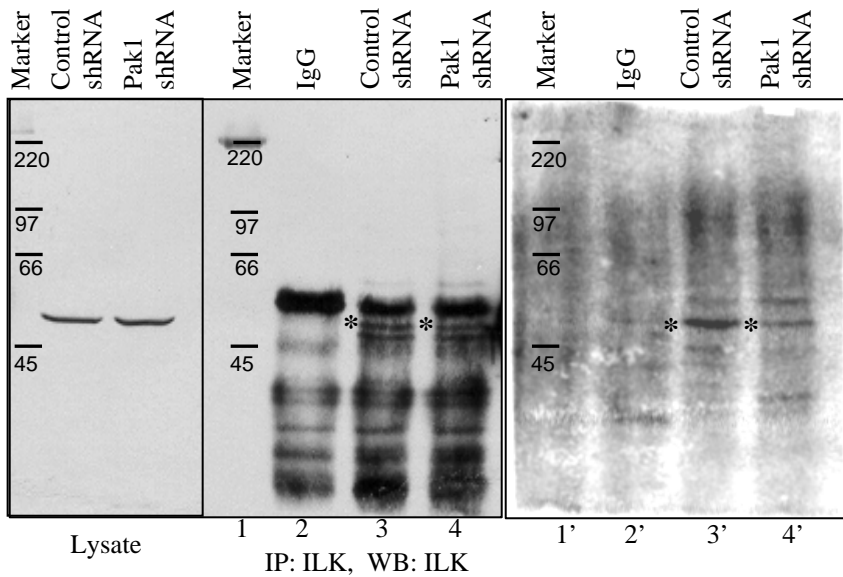

Supplement: pnas_0701999104_2.pdf [file pnas_0701999104_2.pdf]
